# Supplementary material for: A Noninvasive Score to Predict Liver Fibrosis in HBeAg-Positive Hepatitis B Patients with Normal or Minimally Elevated Alanine Aminotransferase Levels
Source: Hindawi journal article supplement (doi:10.1155/2018/3924732), 2018-10-14
Supplement: f3 [file 3924732.f3.pdf]

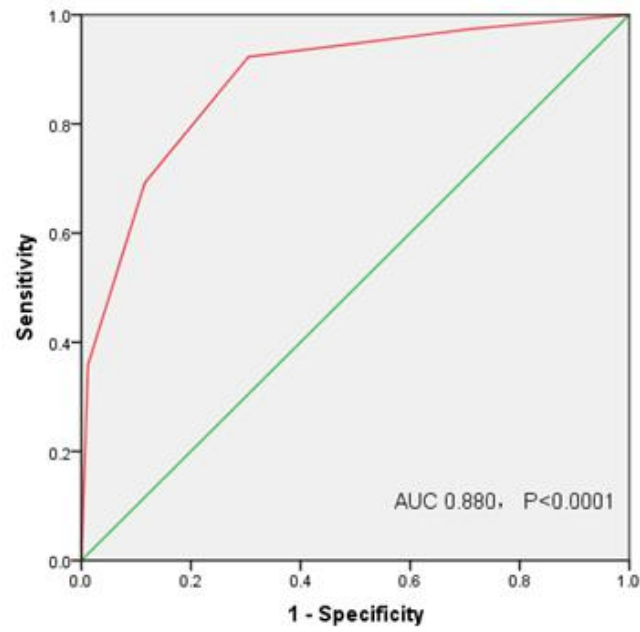

**Supplementary Figure 1:** Receiver operating characteristic curve of the score for identifying significant from insignificant liver fibrosis in the training group patients.
